# Supplementary material for: Influence of the Soluble–Insoluble Ratios of Cyclodextrins Polymers on the Viscoelastic Properties of Injectable Chitosan–Based Hydrogels for Biomedical Application
Source: MDPI journal article supplement (doi:10.3390/polym11020214), 2019-01-26

## Supplementary Materials

### Influence of the Soluble–Insoluble Ratios of Cyclodextrins Polymers on the Viscoelastic Properties of Injectable Chitosan–Based Hydrogels for Biomedical Application

Carla Palomino-Durand, Marco Lopez, Frédéric Cazaux, Bernard Martel, Nicolas Blanchemain and Feng Chai

Supplementary data showing the cohesion of injected hydrogel through needle into PBS for 7 days

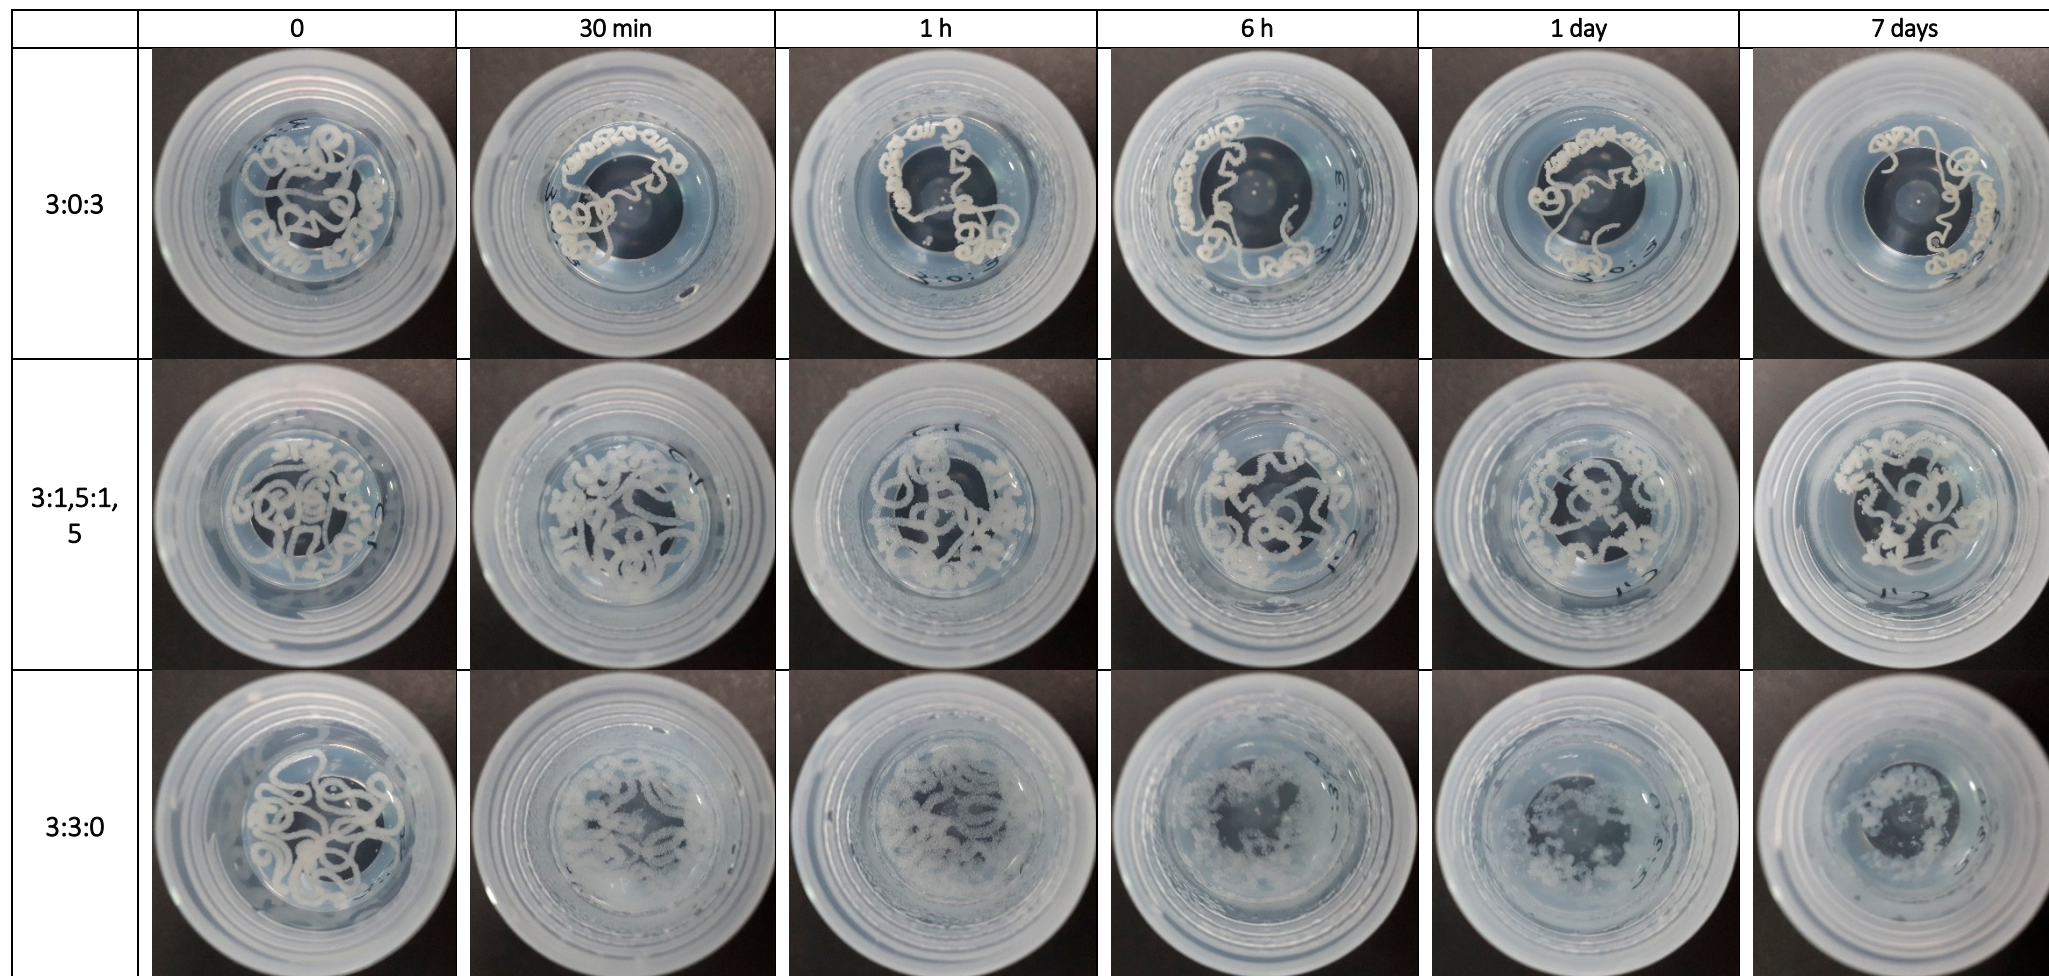

Supplement: s1 [file s1]
